# Supplementary material for: Evidence for high inter-generational individual quality in yellow-eyed penguins
Source: PeerJ. 2017 Feb 28;5:e2935. doi: 10.7717/peerj.2935 (PMC5333550; doi:10.7717/peerj.2935)
Supplement: Supplemental Information 2 [file peerj-05-2935-s002.xlsx]

## Sheet: Sheet1
BIRDID	LIFESPAN	COHORT	GRANDCHICKS	SUCCESSFULBREEDINGOFFSPRING	BREEDINGOFFSPRING	TOTALNOBREEDINGATTEMPTS	SURVIVINGJUVENILES	TOTALMATES	AGEATFIRSTBREEDING	BREEDINGLIFESPAN	LRS	SEX	BREEDERTYPE
BIRD4	9	1981	1	1	1	2	1	2	3	6	1	F	ORDINARY
BIRD5	19	1981	7	3	4	12	9	3	3	16	17	F	ORDINARY
BIRD10	4	1981	0	0	0	3	0	3	2	2	2	F	ORDINARY
BIRD13	10	1983	19	2	2	5	2	2	5	5	6	F	ORDINARY
BIRD17	6	1983	0	0	1	4	1	1	3	3	5	F	ORDINARY
BIRD20	15	1983	0	0	1	9	1	1	3	12	4	F	ORDINARY
BIRD23	15	1983	9	3	3	4	4	1	12	3	8	F	ORDINARY
BIRD25	6	1983	0	0	0	3	0	1	4	2	4	F	ORDINARY
BIRD27	5	1983	0	0	0	1	0	1	5	0	1	F	ORDINARY
BIRD28	11	1983	7	2	4	8	4	2	2	9	9	F	ORDINARY
BIRD32	22	1982	5	1	3	10	5	3	5	17	13	F	ORDINARY
BIRD33	18	1982	8	1	2	3	2	1	2	16	4	F	ORDINARY
BIRD35	2	1982	0	0	0	1	0	1	2	0	0	F	ORDINARY
BIRD36	3	1982	0	0	0	1	0	1	3	0	2	F	ORDINARY
BIRD37	6	1982	0	0	0	2	0	2	3	3	1	F	ORDINARY
BIRD45	9	1986	13	2	3	6	5	4	3	6	6	F	ORDINARY
BIRD52	4	1987	0	0	0	1	0	1	4	0	2	F	ORDINARY
BIRD55	18	1988	2	1	2	13	2	7	5	13	10	F	ORDINARY
BIRD61	9	1988	9	2	4	7	6	2	3	6	10	F	ORDINARY
BIRD64	4	1988	0	0	0	2	2	2	3	1	2	F	ORDINARY
BIRD66	11	1988	6	1	4	7	6	2	4	7	7	F	ORDINARY
BIRD72	5	1991	1	1	1	2	1	1	4	1	3	F	ORDINARY
BIRD73	5	1991	31	4	4	4	4	2	2	3	6	F	ORDINARY
BIRD74	6	1990	7	3	5	4	5	1	3	3	6	F	ORDINARY
BIRD75	5	1991	14	1	1	4	2	1	2	3	4	F	ORDINARY
BIRD78	6	1992	6	2	4	5	6	1	2	4	10	F	ORDINARY
BIRD90	4	1993	0	0	1	3	1	1	2	2	3	F	ORDINARY
BIRD93	5	1992	13	1	1	3	1	1	3	2	6	F	ORDINARY
BIRD94	4	1994	14	1	1	2	1	2	2	2	2	F	ORDINARY
BIRD95	3	1994	0	0	0	2	0	2	2	1	1	F	ORDINARY
BIRD97	7	1994	0	0	1	5	1	3	3	4	4	F	ORDINARY
BIRD98	4	1994	0	0	0	1	0	1	4	0	1	F	ORDINARY
BIRD99	8	1992	0	0	2	6	5	4	3	5	8	F	ORDINARY
BIRD103	13	1992	6	2	2	10	2	3	3	10	7	F	ORDINARY
BIRD105	4	2000	14	1	1	2	1	2	3	1	1	F	ORDINARY
BIRD109	7	1994	0	0	0	6	0	2	2	5	6	F	ORDINARY
BIRD111	11	1995	6	2	2	8	2	1	4	7	7	F	ORDINARY
BIRD112	6	1995	0	0	0	4	0	3	2	4	0	F	ORDINARY
BIRD118	8	1994	0	0	0	4	0	1	5	3	4	F	ORDINARY
BIRD119	3	1995	0	0	0	1	0	1	3	0	0	F	ORDINARY
BIRD121	4	1996	0	0	0	2	0	2	3	1	1	F	ORDINARY
BIRD125	7	1997	9	1	1	4	1	1	4	3	3	F	ORDINARY
BIRD126	3	1997	0	0	0	1	0	1	3	0	1	F	ORDINARY
BIRD127	3	1997	0	0	0	1	0	1	3	0	0	F	ORDINARY
BIRD129	3	2003	0	0	0	1	0	1	3	0	1	F	ORDINARY
BIRD130	4	2003	0	0	0	2	0	1	3	1	2	F	ORDINARY
BIRD6	17	1981	40	5	8	12	8	1	3	14	19	F	SUPERBREEDER
BIRD14	16	1983	77	5	5	9	7	1	7	9	16	F	SUPERBREEDER
BIRD21	17	1983	32	3	4	12	8	4	4	13	11	F	SUPERBREEDER
BIRD22	24	1983	17	4	6	16	9	5	7	17	17	F	SUPERBREEDER
BIRD29	18	1983	12	2	3	7	4	2	10	8	8	F	SUPERBREEDER
BIRD30	16	1982	25	1	3	9	5	3	6	10	11	F	SUPERBREEDER
BIRD50	10	1987	21	3	4	7	7	3	4	6	11	F	SUPERBREEDER
BIRD51	12	1987	33	4	6	9	7	1	4	8	12	F	SUPERBREEDER
BIRD56	13	1988	17	2	2	9	2	3	4	9	10	F	SUPERBREEDER
BIRD60	7	1988	17	3	3	5	4	1	3	4	7	F	SUPERBREEDER
BIRD67	16	1989	11	4	6	14	7	2	3	13	21	F	SUPERBREEDER
BIRD69	18	1988	12	3	6	15	10	3	3	15	24	F	SUPERBREEDER
BIRD70	19	1988	40	7	9	16	13	5	3	16	19	F	SUPERBREEDER
BIRD71	11	1988	13	4	4	8	7	3	4	7	12	F	SUPERBREEDER
BIRD76	15	1991	30	3	4	12	6	3	3	12	11	F	SUPERBREEDER
BIRD84	12	1993	15	3	5	8	5	3	3	9	13	F	SUPERBREEDER
BIRD1	8	1981	0	0	0	5	0	2	3	5	4	M	ORDINARY
BIRD2	4	1981	0	0	0	2	0	2	3	1	1	M	ORDINARY
BIRD3	8	1981	0	0	2	6	2	1	3	5	5	M	ORDINARY
BIRD7	5	1981	0	0	0	3	1	1	3	2	4	M	ORDINARY
BIRD8	4	1981	0	0	0	1	0	1	4	0	1	M	ORDINARY
BIRD11	4	1981	0	0	0	1	0	1	4	0	2	M	ORDINARY
BIRD12	8	1983	0	0	0	1	0	1	8	0	1	M	ORDINARY
BIRD16	4	1983	0	0	1	1	1	1	4	0	1	M	ORDINARY
BIRD18	18	1983	4	1	1	7	3	2	11	7	11	M	ORDINARY
BIRD19	16	1983	0	0	1	10	1	2	3	13	4	M	ORDINARY
BIRD24	6	1983	0	0	0	1	1	1	6	0	2	M	ORDINARY
BIRD31	10	1982	6	1	1	4	1	2	3	7	3	M	ORDINARY
BIRD38	2	1982	0	0	0	1	0	1	2	0	2	M	ORDINARY
BIRD42	9	1984	2	1	1	1	1	1	9	0	1	M	ORDINARY
BIRD44	12	1984	0	0	2	9	3	2	4	8	11	M	ORDINARY
BIRD46	8	1987	2	1	1	4	3	1	5	3	4	M	ORDINARY
BIRD48	9	1987	5	2	3	6	3	2	4	5	7	M	ORDINARY
BIRD49	9	1987	5	1	2	4	3	1	6	3	3	M	ORDINARY
BIRD53	9	1987	3	1	3	4	4	1	6	3	5	M	ORDINARY
BIRD54	9	1987	0	0	0	9	0	2	6	3	2	M	ORDINARY
BIRD59	19	1988	5	2	4	12	5	6	5	14	14	M	ORDINARY
BIRD63	17	1988	0	0	4	8	4	4	3	14	8	M	ORDINARY
BIRD65	14	1988	2	1	1	10	1	2	5	9	11	M	ORDINARY
BIRD68	17	1989	0	0	0	9	0	3	4	13	7	M	ORDINARY
BIRD77	13	1991	0	0	0	8	1	6	5	8	5	M	ORDINARY
BIRD79	4	1992	2	1	1	2	2	1	3	1	3	M	ORDINARY
BIRD80	5	1992	2	1	1	3	1	1	3	2	4	M	ORDINARY
BIRD81	5	1992	0	0	0	3	0	1	3	2	2	M	ORDINARY
BIRD83	5	1993	0	0	0	2	0	2	3	2	1	M	ORDINARY
BIRD85	3	1993	0	0	0	1	1	1	3	0	1	M	ORDINARY
BIRD86	3	1993	0	0	0	1	1	1	3	0	1	M	ORDINARY
BIRD87	12	1993	1	1	2	9	3	5	3	9	7	M	ORDINARY
BIRD88	3	1993	0	0	1	1	1	1	3	0	1	M	ORDINARY
BIRD89	3	1993	0	0	0	1	0	1	3	0	2	M	ORDINARY
BIRD92	9	1992	0	0	0	6	1	3	3	6	6	M	ORDINARY
BIRD100	5	1992	0	0	2	3	5	1	3	2	5	M	ORDINARY
BIRD101	8	1992	0	0	1	4	2	3	3	5	3	M	ORDINARY
BIRD104	8	1991	0	0	1	3	1	1	6	2	2	M	ORDINARY
BIRD106	2	1994	0	0	0	1	0	1	2	0	0	M	ORDINARY
BIRD107	3	1994	1	1	1	2	1	2	2	1	2	M	ORDINARY
BIRD108	3	1994	0	0	0	1	0	1	3	0	0	M	ORDINARY
BIRD110	6	1995	0	0	0	5	0	1	2	4	1	M	ORDINARY
BIRD113	5	1995	0	0	0	2	0	2	2	3	2	M	ORDINARY
BIRD114	6	1995	0	0	0	4	0	3	3	3	0	M	ORDINARY
BIRD115	3	1995	0	0	0	1	0	1	3	0	0	M	ORDINARY
BIRD116	6	1995	0	0	0	3	0	2	3	3	2	M	ORDINARY
BIRD117	10	1995	4	1	1	3	1	3	3	7	2	M	ORDINARY
BIRD120	6	1995	0	0	0	1	0	1	6	0	2	M	ORDINARY
BIRD122	11	1996	0	0	0	4	0	2	7	4	3	M	ORDINARY
BIRD123	3	1996	0	0	0	1	0	1	3	0	1	M	ORDINARY
BIRD124	6	1997	1	1	1	3	1	1	4	2	4	M	ORDINARY
BIRD128	9	1998	0	0	0	4	0	3	6	3	2	M	ORDINARY
BIRD9	17	1981	25	2	6	11	7	3	4	13	14	M	SUPERBREEDER
BIRD15	13	1983	8	2	2	7	3	2	7	6	8	M	SUPERBREEDER
BIRD26	21	1983	7	2	5	10	5	2	3	18	15	M	SUPERBREEDER
BIRD34	18	1982	17	2	5	8	5	4	2	16	8	M	SUPERBREEDER
BIRD39	17	1982	13	1	2	7	2	3	9	8	8	M	SUPERBREEDER
BIRD40	11	1983	37	4	4	7	6	1	4	7	13	M	SUPERBREEDER
BIRD41	19	1984	77	5	5	14	7	2	6	13	23	M	SUPERBREEDER
BIRD43	9	1988	17	2	2	6	2	2	3	6	6	M	SUPERBREEDER
BIRD47	19	1987	14	4	6	13	6	3	5	14	18	M	SUPERBREEDER
BIRD57	8	1988	8	2	2	4	4	2	3	5	5	M	SUPERBREEDER
BIRD58	8	1988	7	3	5	4	5	1	5	3	6	M	SUPERBREEDER
BIRD62	10	1988	12	2	3	5	5	2	6	4	9	M	SUPERBREEDER
BIRD82	9	1993	28	3	3	7	4	2	3	6	11	M	SUPERBREEDER
BIRD91	8	1993	7	1	1	6	1	2	3	5	6	M	SUPERBREEDER
BIRD96	8	1994	14	1	1	6	1	2	2	6	7	M	SUPERBREEDER
BIRD102	14	1992	10	2	3	9	3	3	3	11	10	M	SUPERBREEDER
